# Supplementary material for: Isowighteone attenuates vascular calcification by targeting HSP90AA1-mediated PI3K-Akt pathway and suppressing osteogenic gene expression
Source: Front Bioeng Biotechnol. 2025 Aug 20;13:1636883. doi: 10.3389/fbioe.2025.1636883 (PMC12405412; doi:10.3389/fbioe.2025.1636883)
Supplement: Supplementary file 5 [file Table3.xls]

## Sheet: VSGOBP
Category	Term	Count	%	PValue	Genes	List Total	Pop Hits	Pop Total	Fold Enrichment	Bonferroni	Benjamini	FDR
GOTERM_BP_DIRECT	GO:0016310~phosphorylation	19	29.6875	6.86e-13	CDKL5, LRRK2, DYRK1A, TYK2, EGFR, RPS6KA3, WEE1, MAPK8, MELK, PLAU, CDK4, MAK, KIT, CHEK1, CDK2, ABL1, RAF1, JAK3, EPHA2	64	633	19734	9.25518	9.42e-10	4.71e-10	4.52e-10
GOTERM_BP_DIRECT	GO:0006468~protein phosphorylation	16	25	6.39e-13	CDKL5, LRRK2, DYRK1A, TYK2, CDC25B, IKBKB, WEE1, MAPK8, MELK, CDK4, MAK, CHEK1, CDK2, ABL1, RAF1, JAK3	64	376	19734	13.121	8.77e-10	4.71e-10	4.52e-10
GOTERM_BP_DIRECT	GO:0007165~signal transduction	15	23.4375	2.84e-05	CSF1R, LRRK2, ESR1, EGFR, ESR2, RPS6KA3, MAPK8, PLAU, CDK4, KIT, CDK2, ADORA1, ABL1, RAF1, DRD4	64	1240	19734	3.72996	0.0382808	0.00279177	0.00268197
GOTERM_BP_DIRECT	GO:0045944~positive regulation of transcription by RNA polymerase II	14	21.875	0.000139	ESRRA, ESRRB, ADRB2, ESR1, SIRT1, EGFR, IL2, ESR2, IKBKB, RPS6KA3, ABL1, EP300, RAF1, DRD2	64	1256	19734	3.43695	0.174246	0.00904233	0.0086867
GOTERM_BP_DIRECT	GO:0008284~positive regulation of cell population proliferation	12	18.75	5.22e-07	PDGFRA, CSF1R, CDK4, CDK2, BCL2, MIF, HTR2A, F2, SIRT1, EGFR, IL2, CDC25B	64	506	19734	7.3125	0.000716	0.000102	9.76e-05
GOTERM_BP_DIRECT	GO:0070374~positive regulation of ERK1 and ERK2 cascade	11	17.1875	2.6e-09	PDGFRA, CSF1R, ALOX15, ABL1, NOX4, HTR2C, MIF, HTR2A, OPRM1, DRD2, EGFR	64	228	19734	14.8762	3.58e-06	8.94e-07	8.59e-07
GOTERM_BP_DIRECT	GO:0043066~negative regulation of apoptotic process	11	17.1875	4.32e-06	RPS6KA3, CSF1R, MAPK8, BCL2, ADORA1, MIF, RAF1, SIRT1, EGFR, IL2, BCL2L1	64	507	19734	6.6899	0.0059146	0.000494	0.000475
GOTERM_BP_DIRECT	GO:0046777~protein autophosphorylation	10	15.625	1.05e-09	PDGFRA, CSF1R, CDKL5, MELK, MAK, LRRK2, KIT, DYRK1A, ABL1, EGFR	64	149	19734	20.6942	1.44e-06	4.79e-07	4.6e-07
GOTERM_BP_DIRECT	GO:0009410~response to xenobiotic stimulus	10	15.625	1.09e-07	HSP90AA1, ABCB1, MAOB, ADORA2A, CDK4, BCL2, ABL1, HTR2A, DRD2, SLC6A2	64	254	19734	12.1395	0.000149	2.98e-05	2.87e-05
GOTERM_BP_DIRECT	GO:0006954~inflammatory response	9	14.0625	5.66e-05	IKBKB, CSF1R, ADORA2A, ALOX15, KIT, ADORA1, NOX4, MIF, EPHA2	64	422	19734	6.57605	0.0748268	0.00486075	0.00466958
GOTERM_BP_DIRECT	GO:0035556~intracellular signal transduction	9	14.0625	6.67e-05	RPS6KA3, MELK, MAK, LRRK2, CHEK1, KIT, TYK2, DRD2, JAK3	64	432	19734	6.42383	0.0875611	0.00539007	0.00517807
GOTERM_BP_DIRECT	GO:0045893~positive regulation of DNA-templated transcription	9	14.0625	0.0018707	IKBKB, MAK, ESRRB, CDK2, DYRK1A, EP300, ESR1, EGFR, ESR2	64	713	19734	3.89214	0.923531	0.0513693	0.049349
GOTERM_BP_DIRECT	GO:0001934~positive regulation of protein phosphorylation	8	12.5	4.11e-06	CSF1R, HSP90AA1, LRRK2, ABL1, F2, RAF1, SIRT1, EGFR	64	206	19734	11.9745	0.00563173	0.000494	0.000475
GOTERM_BP_DIRECT	GO:0051897~positive regulation of phosphatidylinositol 3-kinase/protein kinase B signal transduction	7	10.9375	3.36e-05	PDGFRA, CSF1R, KIT, NOX4, F2, SIRT1, EGFR	64	192	19734	11.2417	0.0451145	0.00307754	0.0029565
GOTERM_BP_DIRECT	GO:0008285~negative regulation of cell population proliferation	7	10.9375	0.00257852	CSF1R, ADORA2A, ADORA1, NOX4, OPRM1, DRD2, RAF1	64	434	19734	4.97329	0.971128	0.0632199	0.0607334
GOTERM_BP_DIRECT	GO:0006915~apoptotic process	7	10.9375	0.0114561	MELK, ADORA2A, CHEK1, BCL2, EP300, RAF1, BCL2L1	64	593	19734	3.63981	1	0.181117	0.173994
GOTERM_BP_DIRECT	GO:0018108~peptidyl-tyrosine phosphorylation	6	9.375	5.35e-07	PDGFRA, CSF1R, DYRK1A, ABL1, JAK3, EGFR	64	50	19734	37.0012	0.000734	0.000102	9.76e-05
GOTERM_BP_DIRECT	GO:0000086~G2/M transition of mitotic cell cycle	6	9.375	5.92e-07	WEE1, MELK, ABCB1, CHEK1, CDK2, CDC25B	64	51	19734	36.2757	0.000812	0.000102	9.76e-05
GOTERM_BP_DIRECT	GO:0048146~positive regulation of fibroblast proliferation	6	9.375	7.91e-07	PDGFRA, CDK4, ABL1, MIF, ESR1, EGFR	64	54	19734	34.2604	0.00108521	0.000121	0.000116
GOTERM_BP_DIRECT	GO:0018105~peptidyl-serine phosphorylation	6	9.375	0.000145	IKBKB, RPS6KA3, MAPK8, LRRK2, CDK2, DYRK1A	64	157	19734	11.7838	0.180406	0.00904233	0.0086867
GOTERM_BP_DIRECT	GO:0042981~regulation of apoptotic process	6	9.375	0.000772	HSP90AA1, ABL1, RAF1, SIRT1, JAK3, BCL2L1	64	226	19734	8.18612	0.653644	0.0286454	0.0275188
GOTERM_BP_DIRECT	GO:0007268~chemical synaptic transmission	6	9.375	0.000868	RPS6KA3, HTR2C, HTR2A, SLC6A2, GRIN2B, DRD4	64	232	19734	7.97441	0.696574	0.0305659	0.0293637
GOTERM_BP_DIRECT	GO:0030335~positive regulation of cell migration	6	9.375	0.00221893	PDGFRA, CSF1R, PLAU, KIT, EGFR, EPHA2	64	287	19734	6.44621	0.95264	0.0555088	0.0533256
GOTERM_BP_DIRECT	GO:0033674~positive regulation of kinase activity	5	7.8125	2.85e-05	PDGFRA, CSF1R, EGFR, DRD4, EPHA2	64	55	19734	28.0312	0.0383313	0.00279177	0.00268197
GOTERM_BP_DIRECT	GO:0060079~excitatory postsynaptic potential	5	7.8125	7.38e-05	ADORA2A, LRRK2, ADORA1, DRD2, GRIN2B	64	70	19734	22.0246	0.0964141	0.00563224	0.00541072
GOTERM_BP_DIRECT	GO:0007275~multicellular organism development	5	7.8125	0.000131	PDGFRA, CSF1R, KIT, EGFR, EPHA2	64	81	19734	19.0336	0.164067	0.00897698	0.00862391
GOTERM_BP_DIRECT	GO:0030307~positive regulation of cell growth	5	7.8125	0.00018	RPS6KA3, BCL2, F2, EGFR, IL2	64	88	19734	17.5195	0.218879	0.0107393	0.0103169
GOTERM_BP_DIRECT	GO:0007200~phospholipase C-activating G protein-coupled receptor signaling pathway	5	7.8125	0.000294	HTR2C, HTR2A, OPRM1, DRD2, ESR1	64	100	19734	15.4172	0.33216	0.0168186	0.0161572
GOTERM_BP_DIRECT	GO:0007204~positive regulation of cytosolic calcium ion concentration	5	7.8125	0.00155798	ABL1, HTR2A, OPRM1, ESR1, IL2	64	156	19734	9.88281	0.882437	0.0475358	0.0456662
GOTERM_BP_DIRECT	GO:0043410~positive regulation of MAPK cascade	5	7.8125	0.00306653	KIT, ADORA1, ADRB2, DRD2, RAF1	64	188	19734	8.20063	0.985254	0.0734516	0.0705627
GOTERM_BP_DIRECT	GO:0043065~positive regulation of apoptotic process	5	7.8125	0.0195083	MAPK8, MELK, BCL2, ABL1, SIRT1	64	322	19734	4.78795	1	0.243499	0.233922
GOTERM_BP_DIRECT	GO:0007283~spermatogenesis	5	7.8125	0.0750648	MAK, LRRK2, KIT, SIRT1, BCL2L1	64	499	19734	3.08962	1	0.47277	0.454176
GOTERM_BP_DIRECT	GO:0051967~negative regulation of synaptic transmission, glutamatergic	4	6.25	2.57e-06	ADORA1, HTR2A, DRD2, DRD4	64	9	19734	137.042	0.00352143	0.000353	0.000339
GOTERM_BP_DIRECT	GO:0045907~positive regulation of vasoconstriction	4	6.25	0.000131	TBXAS1, ABL1, HTR2A, EGFR	64	31	19734	39.7863	0.164355	0.00897698	0.00862391
GOTERM_BP_DIRECT	GO:0046427~positive regulation of receptor signaling pathway via JAK-STAT	4	6.25	0.000349	KIT, EP300, TYK2, F2	64	43	19734	28.6831	0.381053	0.0187956	0.0180564
GOTERM_BP_DIRECT	GO:0048538~thymus development	4	6.25	0.000484	BCL2, ABL1, TYR, RAF1	64	48	19734	25.6953	0.485625	0.0237372	0.0228036
GOTERM_BP_DIRECT	GO:0050673~epithelial cell proliferation	4	6.25	0.000546	KIT, DRD2, EGFR, BCL2L1	64	50	19734	24.6675	0.527619	0.0249922	0.0240092
GOTERM_BP_DIRECT	GO:0008630~intrinsic apoptotic signaling pathway in response to DNA damage	4	6.25	0.000579	BCL2, ABL1, EPHA2, BCL2L1	64	51	19734	24.1838	0.548441	0.0256393	0.0246309
GOTERM_BP_DIRECT	GO:0034614~cellular response to reactive oxygen species	4	6.25	0.000648	PDGFRA, MAPK8, LRRK2, EGFR	64	53	19734	23.2712	0.589478	0.026982	0.0259208
GOTERM_BP_DIRECT	GO:0007187~G protein-coupled receptor signaling pathway, coupled to cyclic nucleotide second messenger	4	6.25	0.000685	HTR2C, HTR2A, OPRM1, DRD4	64	54	19734	22.8403	0.609598	0.0275624	0.0264784
GOTERM_BP_DIRECT	GO:0018107~peptidyl-threonine phosphorylation	4	6.25	0.000723	MAPK8, LRRK2, CHEK1, DYRK1A	64	55	19734	22.425	0.62939	0.0275624	0.0264784
GOTERM_BP_DIRECT	GO:0043406~positive regulation of MAP kinase activity	4	6.25	0.000723	LRRK2, KIT, EGFR, DRD4	64	55	19734	22.425	0.62939	0.0275624	0.0264784
GOTERM_BP_DIRECT	GO:0090398~cellular senescence	4	6.25	0.000802	MAPK8, CDK2, ABL1, MIF	64	57	19734	21.6382	0.667823	0.0289907	0.0278505
GOTERM_BP_DIRECT	GO:0048812~neuron projection morphogenesis	4	6.25	0.000978	WEE1, ADORA2A, LRRK2, EGFR	64	61	19734	20.2193	0.739055	0.0327403	0.0314527
GOTERM_BP_DIRECT	GO:0033138~positive regulation of peptidyl-serine phosphorylation	4	6.25	0.00164477	BCL2, MIF, RAF1, EGFR	64	73	19734	16.8955	0.895663	0.0483825	0.0464796
GOTERM_BP_DIRECT	GO:0051898~negative regulation of phosphatidylinositol 3-kinase/protein kinase B signal transduction	4	6.25	0.00171039	DRD2, SIRT1, XDH, EPHA2	64	74	19734	16.6672	0.904667	0.0489244	0.0470002
GOTERM_BP_DIRECT	GO:0009636~response to toxic substance	4	6.25	0.00198918	MAOB, PON1, BCL2, DRD2	64	78	19734	15.8125	0.935032	0.0534836	0.0513801
GOTERM_BP_DIRECT	GO:0001933~negative regulation of protein phosphorylation	4	6.25	0.00221579	LRRK2, DRD2, XDH, IL2	64	81	19734	15.2269	0.952435	0.0555088	0.0533256
GOTERM_BP_DIRECT	GO:0051091~positive regulation of DNA-binding transcription factor activity	4	6.25	0.00338034	KIT, EP300, ESR1, ESR2	64	94	19734	13.121	0.99043	0.0773535	0.0743112
GOTERM_BP_DIRECT	GO:0045471~response to ethanol	4	6.25	0.00498829	MAOB, TBXAS1, GRIN2B, IL2	64	108	19734	11.4201	0.998957	0.103771	0.0996901
GOTERM_BP_DIRECT	GO:0006874~intracellular calcium ion homeostasis	4	6.25	0.00524955	HTR2C, HTR2A, DRD2, DRD4	64	110	19734	11.2125	0.999273	0.107577	0.103346
GOTERM_BP_DIRECT	GO:0007169~cell surface receptor protein tyrosine kinase signaling pathway	4	6.25	0.00538322	PDGFRA, CSF1R, EGFR, EPHA2	64	111	19734	11.1115	0.999396	0.108694	0.104419
GOTERM_BP_DIRECT	GO:0008584~male gonad development	4	6.25	0.00551893	KIT, BCL2, ESR1, BCL2L1	64	112	19734	11.0123	0.999499	0.109383	0.105081
GOTERM_BP_DIRECT	GO:0006979~response to oxidative stress	4	6.25	0.00714842	MAPK8, LRRK2, ABL1, SIRT1	64	123	19734	10.0274	0.999947	0.127465	0.122452
GOTERM_BP_DIRECT	GO:0042127~regulation of cell population proliferation	4	6.25	0.0116084	PLAU, CHEK1, KIT, SIRT1	64	147	19734	8.39031	1	0.181117	0.173994
GOTERM_BP_DIRECT	GO:0043524~negative regulation of neuron apoptotic process	4	6.25	0.0124764	ADORA2A, BCL2, SIRT1, BCL2L1	64	151	19734	8.16805	1	0.18764	0.18026
GOTERM_BP_DIRECT	GO:0008283~cell population proliferation	4	6.25	0.0126991	CSF1R, MELK, ESRRB, TYR	64	152	19734	8.11431	1	0.18764	0.18026
GOTERM_BP_DIRECT	GO:0019221~cytokine-mediated signaling pathway	4	6.25	0.0133809	CSF1R, KIT, TYK2, JAK3	64	155	19734	7.95726	1	0.195446	0.187759
GOTERM_BP_DIRECT	GO:0006914~autophagy	4	6.25	0.0140832	LRRK2, BCL2, ABL1, DRD2	64	158	19734	7.80617	1	0.201419	0.193498
GOTERM_BP_DIRECT	GO:0001666~response to hypoxia	4	6.25	0.0190141	PLAU, ADORA1, EP300, DRD2	64	177	19734	6.96822	1	0.241726	0.232219
GOTERM_BP_DIRECT	GO:0098609~cell-cell adhesion	4	6.25	0.0314044	KIT, BCL2, ABL1, EGFR	64	215	19734	5.73663	1	0.296012	0.28437
GOTERM_BP_DIRECT	GO:0007267~cell-cell signaling	4	6.25	0.0388591	ADORA2A, ADORA1, ESR2, IL2	64	234	19734	5.27083	1	0.331389	0.318355
GOTERM_BP_DIRECT	GO:0006974~DNA damage response	4	6.25	0.0749286	CHEK1, BCL2, ABL1, SIRT1	64	307	19734	4.01751	1	0.47277	0.454176
GOTERM_BP_DIRECT	GO:0010629~negative regulation of gene expression	4	6.25	0.076648	MIF, ESR1, SIRT1, XDH	64	310	19734	3.97863	1	0.475432	0.456733
GOTERM_BP_DIRECT	GO:0007166~cell surface receptor signaling pathway	4	6.25	0.0831009	ADRB2, MIF, F2, EGFR	64	321	19734	3.84229	1	0.493929	0.474503
GOTERM_BP_DIRECT	GO:0006338~chromatin remodeling	4	6.25	0.0966826	CHEK1, CDK2, DYRK1A, ESR1	64	343	19734	3.59585	1	0.55223	0.530511
GOTERM_BP_DIRECT	GO:0048149~behavioral response to ethanol	3	4.6875	0.000356	OPRM1, DRD2, DRD4	64	9	19734	102.781	0.386621	0.0187956	0.0180564
GOTERM_BP_DIRECT	GO:0060397~growth hormone receptor signaling pathway via JAK-STAT	3	4.6875	0.000444	PTPN1, TYK2, JAK3	64	10	19734	92.5031	0.456505	0.0225778	0.0216898
GOTERM_BP_DIRECT	GO:0051481~negative regulation of cytosolic calcium ion concentration	3	4.6875	0.000542	OPRM1, DRD2, DRD4	64	11	19734	84.0938	0.524665	0.0249922	0.0240092
GOTERM_BP_DIRECT	GO:0030518~nuclear receptor-mediated steroid hormone signaling pathway	3	4.6875	0.000649	ESRRA, ESRRB, ESR1	64	12	19734	77.0859	0.589629	0.026982	0.0259208
GOTERM_BP_DIRECT	GO:0038083~peptidyl-tyrosine autophosphorylation	3	4.6875	0.00089	DYRK1A, ABL1, EGFR	64	14	19734	66.0737	0.705707	0.0305659	0.0293637
GOTERM_BP_DIRECT	GO:1902166~negative regulation of intrinsic apoptotic signaling pathway in response to DNA damage by p53 class mediator	3	4.6875	0.00102537	BCL2, MIF, SIRT1	64	15	19734	61.6688	0.755504	0.0327403	0.0314527
GOTERM_BP_DIRECT	GO:0043518~negative regulation of DNA damage response, signal transduction by p53 class mediator	3	4.6875	0.00102537	DYRK1A, MIF, SIRT1	64	15	19734	61.6688	0.755504	0.0327403	0.0314527
GOTERM_BP_DIRECT	GO:0048148~behavioral response to cocaine	3	4.6875	0.00116944	HTR2A, DRD2, DRD4	64	16	19734	57.8145	0.799429	0.036492	0.0350567
GOTERM_BP_DIRECT	GO:1902236~negative regulation of endoplasmic reticulum stress-induced intrinsic apoptotic signaling pathway	3	4.6875	0.00165621	PTPN1, LRRK2, BCL2L1	64	19	19734	48.6859	0.897292	0.0483825	0.0464796
GOTERM_BP_DIRECT	GO:0061098~positive regulation of protein tyrosine kinase activity	3	4.6875	0.00183646	PTPN1, CSF1R, NOX4	64	20	19734	46.2516	0.919843	0.0513693	0.049349
GOTERM_BP_DIRECT	GO:0001659~temperature homeostasis	3	4.6875	0.0020256	ADORA1, HTR2A, DRD2	64	21	19734	44.0491	0.938207	0.0534836	0.0513801
GOTERM_BP_DIRECT	GO:0043473~pigmentation	3	4.6875	0.00222359	KIT, TYR, DRD2	64	22	19734	42.0469	0.952942	0.0555088	0.0533256
GOTERM_BP_DIRECT	GO:0071880~adenylate cyclase-activating adrenergic receptor signaling pathway	3	4.6875	0.00310283	ADRB2, DRD2, DRD4	64	26	19734	35.5781	0.985974	0.0734516	0.0705627
GOTERM_BP_DIRECT	GO:2000773~negative regulation of cellular senescence	3	4.6875	0.00334419	ABL1, MIF, SIRT1	64	27	19734	34.2604	0.989941	0.0773535	0.0743112
GOTERM_BP_DIRECT	GO:0045740~positive regulation of DNA replication	3	4.6875	0.00439414	WEE1, CDK2, EGFR	64	31	19734	29.8397	0.997634	0.0989042	0.0950143
GOTERM_BP_DIRECT	GO:0099171~presynaptic modulation of chemical synaptic transmission	3	4.6875	0.00467749	ADORA2A, HTR2A, DRD2	64	32	19734	28.9072	0.998399	0.10194	0.0979303
GOTERM_BP_DIRECT	GO:0014059~regulation of dopamine secretion	3	4.6875	0.00467749	HTR2A, DRD2, DRD4	64	32	19734	28.9072	0.998399	0.10194	0.0979303
GOTERM_BP_DIRECT	GO:0051968~positive regulation of synaptic transmission, glutamatergic	3	4.6875	0.00496907	ADORA2A, GRIN2B, EGFR	64	33	19734	28.0312	0.998929	0.103771	0.0996901
GOTERM_BP_DIRECT	GO:0051881~regulation of mitochondrial membrane potential	3	4.6875	0.00496907	ADORA2A, BCL2, BCL2L1	64	33	19734	28.0312	0.998929	0.103771	0.0996901
GOTERM_BP_DIRECT	GO:0001662~behavioral fear response	3	4.6875	0.00557672	BCL2, HTR2C, DRD4	64	35	19734	26.4295	0.999537	0.109383	0.105081
GOTERM_BP_DIRECT	GO:0097192~extrinsic apoptotic signaling pathway in absence of ligand	3	4.6875	0.00589268	BCL2, IL2, BCL2L1	64	36	19734	25.6953	0.999701	0.11237	0.107951
GOTERM_BP_DIRECT	GO:0001975~response to amphetamine	3	4.6875	0.00589268	ADORA2A, DRD2, DRD4	64	36	19734	25.6953	0.999701	0.11237	0.107951
GOTERM_BP_DIRECT	GO:0071392~cellular response to estradiol stimulus	3	4.6875	0.00654861	ESR1, EGFR, ESR2	64	38	19734	24.3429	0.999879	0.119883	0.115168
GOTERM_BP_DIRECT	GO:0001541~ovarian follicle development	3	4.6875	0.00688848	KIT, BCL2, BCL2L1	64	39	19734	23.7188	0.999924	0.124446	0.119551
GOTERM_BP_DIRECT	GO:0045429~positive regulation of nitric oxide biosynthetic process	3	4.6875	0.00870473	HSP90AA1, OPRM1, ESR1	64	44	19734	21.0234	0.999994	0.153226	0.147199
GOTERM_BP_DIRECT	GO:0042311~vasodilation	3	4.6875	0.009091	ADORA2A, ADORA1, EGFR	64	45	19734	20.5562	0.999996	0.154217	0.148152
GOTERM_BP_DIRECT	GO:0030890~positive regulation of B cell proliferation	3	4.6875	0.00948483	BCL2, MIF, IL2	64	46	19734	20.1094	0.999998	0.154217	0.148152
GOTERM_BP_DIRECT	GO:0051209~release of sequestered calcium ion into cytosol	3	4.6875	0.0115655	HTR2C, HTR2A, DRD2	64	51	19734	18.1379	1	0.181117	0.173994
GOTERM_BP_DIRECT	GO:0007249~canonical NF-kappaB signal transduction	3	4.6875	0.0124489	IKBKB, ABL1, EP300	64	53	19734	17.4534	1	0.18764	0.18026
GOTERM_BP_DIRECT	GO:0043627~response to estrogen	3	4.6875	0.0138276	HSP90AA1, EP300, ESR1	64	56	19734	16.5184	1	0.199846	0.191986
GOTERM_BP_DIRECT	GO:0030155~regulation of cell adhesion	3	4.6875	0.0152694	PLAU, ABL1, TYK2	64	59	19734	15.6785	1	0.216133	0.207632
GOTERM_BP_DIRECT	GO:0010507~negative regulation of autophagy	3	4.6875	0.016265	BCL2, EP300, BCL2L1	64	61	19734	15.1644	1	0.223319	0.214535
GOTERM_BP_DIRECT	GO:0071230~cellular response to amino acid stimulus	3	4.6875	0.0178091	PDGFRA, EGFR, BCL2L1	64	64	19734	14.4536	1	0.239725	0.230296
GOTERM_BP_DIRECT	GO:0030097~hemopoiesis	3	4.6875	0.0178091	CSF1R, MELK, KIT	64	64	19734	14.4536	1	0.239725	0.230296
GOTERM_BP_DIRECT	GO:0042531~positive regulation of tyrosine phosphorylation of STAT protein	3	4.6875	0.0194129	CSF1R, KIT, IL2	64	67	19734	13.8064	1	0.243499	0.233922
GOTERM_BP_DIRECT	GO:0007623~circadian rhythm	3	4.6875	0.0199606	DYRK1A, EP300, EGFR	64	68	19734	13.6034	1	0.244695	0.235071
GOTERM_BP_DIRECT	GO:0007611~learning or memory	3	4.6875	0.0199606	EP300, GRIN2B, EGFR	64	68	19734	13.6034	1	0.244695	0.235071
GOTERM_BP_DIRECT	GO:0010506~regulation of autophagy	3	4.6875	0.0205147	LRRK2, ABL1, EP300	64	69	19734	13.4062	1	0.249262	0.239459
GOTERM_BP_DIRECT	GO:0000082~G1/S transition of mitotic cell cycle	3	4.6875	0.0210752	CDK4, CDK2, BCL2	64	70	19734	13.2147	1	0.253826	0.243843
GOTERM_BP_DIRECT	GO:0071260~cellular response to mechanical stimulus	3	4.6875	0.0251743	MAPK8, CHEK1, EGFR	64	77	19734	12.0134	1	0.280968	0.269918
GOTERM_BP_DIRECT	GO:0032729~positive regulation of type II interferon production	3	4.6875	0.0257844	ABL1, TYK2, IL2	64	78	19734	11.8594	1	0.280968	0.269918
GOTERM_BP_DIRECT	GO:0042060~wound healing	3	4.6875	0.0257844	PDGFRA, ALOX15, RAF1	64	78	19734	11.8594	1	0.280968	0.269918
GOTERM_BP_DIRECT	GO:0043491~phosphatidylinositol 3-kinase/protein kinase B signal transduction	3	4.6875	0.0257844	HTR2A, DRD2, EPHA2	64	78	19734	11.8594	1	0.280968	0.269918
GOTERM_BP_DIRECT	GO:0006919~activation of cysteine-type endopeptidase activity involved in apoptotic process	3	4.6875	0.0264005	BCL2, XDH, BCL2L1	64	79	19734	11.7093	1	0.283187	0.272049
GOTERM_BP_DIRECT	GO:0048511~rhythmic process	3	4.6875	0.0264005	MAPK8, EP300, DRD4	64	79	19734	11.7093	1	0.283187	0.272049
GOTERM_BP_DIRECT	GO:0030324~lung development	3	4.6875	0.0282846	PDGFRA, EP300, EGFR	64	82	19734	11.2809	1	0.284358	0.273174
GOTERM_BP_DIRECT	GO:0051402~neuron apoptotic process	3	4.6875	0.0282846	BCL2, ABL1, BCL2L1	64	82	19734	11.2809	1	0.284358	0.273174
GOTERM_BP_DIRECT	GO:0050731~positive regulation of peptidyl-tyrosine phosphorylation	3	4.6875	0.0295698	ABL1, MIF, HTR2A	64	84	19734	11.0123	1	0.294198	0.282627
GOTERM_BP_DIRECT	GO:0007626~locomotory behavior	3	4.6875	0.0302211	ADORA2A, HTR2C, DRD2	64	85	19734	10.8827	1	0.296012	0.28437
GOTERM_BP_DIRECT	GO:0001503~ossification	3	4.6875	0.0308781	ALOX15, BCL2, EGFR	64	86	19734	10.7562	1	0.296012	0.28437
GOTERM_BP_DIRECT	GO:0060326~cell chemotaxis	3	4.6875	0.0335622	PDGFRA, KIT, EPHA2	64	90	19734	10.2781	1	0.306227	0.294183
GOTERM_BP_DIRECT	GO:0030183~B cell differentiation	3	4.6875	0.0335622	KIT, EP300, JAK3	64	90	19734	10.2781	1	0.306227	0.294183
GOTERM_BP_DIRECT	GO:0032880~regulation of protein localization	3	4.6875	0.0356332	HSP90AA1, MAPK8, BCL2	64	93	19734	9.94657	1	0.313618	0.301284
GOTERM_BP_DIRECT	GO:0007596~blood coagulation	3	4.6875	0.0363344	ADORA2A, PLAU, F2	64	94	19734	9.84076	1	0.317752	0.305255
GOTERM_BP_DIRECT	GO:0032956~regulation of actin cytoskeleton organization	3	4.6875	0.0377527	PDGFRA, CSF1R, ABL1	64	96	19734	9.63574	1	0.323965	0.311223
GOTERM_BP_DIRECT	GO:0120162~positive regulation of cold-induced thermogenesis	3	4.6875	0.0413897	ACHE, ALPL, ADRB2	64	101	19734	9.15873	1	0.338262	0.324958
GOTERM_BP_DIRECT	GO:0046718~symbiont entry into host cell	3	4.6875	0.0428802	HTR2A, EGFR, EPHA2	64	103	19734	8.98089	1	0.347558	0.333889
GOTERM_BP_DIRECT	GO:0034599~cellular response to oxidative stress	3	4.6875	0.0436329	MAPK8, LRRK2, ABL1	64	104	19734	8.89453	1	0.347558	0.333889
GOTERM_BP_DIRECT	GO:0001764~neuron migration	3	4.6875	0.0546737	HSP90AA1, CDKL5, KIT	64	118	19734	7.83925	1	0.398061	0.382405
GOTERM_BP_DIRECT	GO:0000165~MAPK cascade	3	4.6875	0.061379	LRRK2, RAF1, EGFR	64	126	19734	7.34152	1	0.425481	0.408747
GOTERM_BP_DIRECT	GO:0001501~skeletal system development	3	4.6875	0.0648324	RPS6KA3, ALPL, EPHA2	64	130	19734	7.11562	1	0.43518	0.418065
GOTERM_BP_DIRECT	GO:0008360~regulation of cell shape	3	4.6875	0.0719296	CSF1R, KIT, F2	64	138	19734	6.70312	1	0.463659	0.445423
GOTERM_BP_DIRECT	GO:0032496~response to lipopolysaccharide	3	4.6875	0.0728339	RPS6KA3, MAOB, ALPL	64	139	19734	6.6549	1	0.467294	0.448916
GOTERM_BP_DIRECT	GO:0000278~mitotic cell cycle	3	4.6875	0.0811367	WEE1, ABL1, CDC25B	64	148	19734	6.25021	1	0.493929	0.474503
GOTERM_BP_DIRECT	GO:0097048~dendritic cell apoptotic process	2	3.125	0.00637489	BCL2, BCL2L1	64	2	19734	308.344	0.999846	0.11828	0.113628
GOTERM_BP_DIRECT	GO:0035358~regulation of peroxisome proliferator activated receptor signaling pathway	2	3.125	0.00637489	ALOX15, SIRT1	64	2	19734	308.344	0.999846	0.11828	0.113628
GOTERM_BP_DIRECT	GO:0051586~positive regulation of dopamine uptake involved in synaptic transmission	2	3.125	0.00954732	DRD2, DRD4	64	3	19734	205.562	0.999998	0.154217	0.148152
GOTERM_BP_DIRECT	GO:0010513~positive regulation of phosphatidylinositol biosynthetic process	2	3.125	0.00954732	HTR2C, HTR2A	64	3	19734	205.562	0.999998	0.154217	0.148152
GOTERM_BP_DIRECT	GO:0031399~regulation of protein modification process	2	3.125	0.00954732	IKBKB, RAF1	64	3	19734	205.562	0.999998	0.154217	0.148152
GOTERM_BP_DIRECT	GO:0007208~phospholipase C-activating serotonin receptor signaling pathway	2	3.125	0.00954732	HTR2C, HTR2A	64	3	19734	205.562	0.999998	0.154217	0.148152
GOTERM_BP_DIRECT	GO:2001303~lipoxin A4 biosynthetic process	2	3.125	0.00954732	ALOX15, ALOX12	64	3	19734	205.562	0.999998	0.154217	0.148152
GOTERM_BP_DIRECT	GO:2000481~positive regulation of cAMP-dependent protein kinase activity	2	3.125	0.0127098	ADRB2, SIRT1	64	4	19734	154.172	1	0.18764	0.18026
GOTERM_BP_DIRECT	GO:0034776~response to histamine	2	3.125	0.0127098	DRD2, DRD4	64	4	19734	154.172	1	0.18764	0.18026
GOTERM_BP_DIRECT	GO:0061370~testosterone biosynthetic process	2	3.125	0.0158623	HSD17B1, CYP19A1	64	5	19734	123.338	1	0.219989	0.211337
GOTERM_BP_DIRECT	GO:0007195~adenylate cyclase-inhibiting dopamine receptor signaling pathway	2	3.125	0.0158623	DRD2, DRD4	64	5	19734	123.338	1	0.219989	0.211337
GOTERM_BP_DIRECT	GO:0051583~dopamine uptake involved in synaptic transmission	2	3.125	0.0190049	DRD2, SLC6A2	64	6	19734	102.781	1	0.241726	0.232219
GOTERM_BP_DIRECT	GO:1990962~xenobiotic transport across blood-brain barrier	2	3.125	0.0190049	ABCB1, ABCG2	64	6	19734	102.781	1	0.241726	0.232219
GOTERM_BP_DIRECT	GO:0035791~platelet-derived growth factor receptor-beta signaling pathway	2	3.125	0.0190049	PTPN1, ABL1	64	6	19734	102.781	1	0.241726	0.232219
GOTERM_BP_DIRECT	GO:0018394~peptidyl-lysine acetylation	2	3.125	0.0190049	EP300, SIRT1	64	6	19734	102.781	1	0.241726	0.232219
GOTERM_BP_DIRECT	GO:0002320~lymphoid progenitor cell differentiation	2	3.125	0.0190049	KIT, BCL2	64	6	19734	102.781	1	0.241726	0.232219
GOTERM_BP_DIRECT	GO:0045937~positive regulation of phosphate metabolic process	2	3.125	0.0221377	CSF1R, KIT	64	7	19734	88.0982	1	0.259786	0.249569
GOTERM_BP_DIRECT	GO:0043266~regulation of potassium ion transport	2	3.125	0.0221377	DRD2, DRD4	64	7	19734	88.0982	1	0.259786	0.249569
GOTERM_BP_DIRECT	GO:0034440~lipid oxidation	2	3.125	0.0221377	ALOX15, ALOX12	64	7	19734	88.0982	1	0.259786	0.249569
GOTERM_BP_DIRECT	GO:0010760~negative regulation of macrophage chemotaxis	2	3.125	0.0252606	MIF, CYP19A1	64	8	19734	77.0859	1	0.280968	0.269918
GOTERM_BP_DIRECT	GO:0001973~G protein-coupled adenosine receptor signaling pathway	2	3.125	0.0252606	ADORA2A, ADORA1	64	8	19734	77.0859	1	0.280968	0.269918
GOTERM_BP_DIRECT	GO:0010544~negative regulation of platelet activation	2	3.125	0.0252606	PDGFRA, F2	64	8	19734	77.0859	1	0.280968	0.269918
GOTERM_BP_DIRECT	GO:0038110~interleukin-2-mediated signaling pathway	2	3.125	0.0252606	JAK3, IL2	64	8	19734	77.0859	1	0.280968	0.269918
GOTERM_BP_DIRECT	GO:0014074~response to purine-containing compound	2	3.125	0.0252606	ADORA2A, ADORA1	64	8	19734	77.0859	1	0.280968	0.269918
GOTERM_BP_DIRECT	GO:2000242~negative regulation of reproductive process	2	3.125	0.0283736	KIT, BCL2L1	64	9	19734	68.5208	1	0.284358	0.273174
GOTERM_BP_DIRECT	GO:0050798~activated T cell proliferation	2	3.125	0.0283736	ABL1, IL2	64	9	19734	68.5208	1	0.284358	0.273174
GOTERM_BP_DIRECT	GO:0007210~serotonin receptor signaling pathway	2	3.125	0.0283736	HTR2C, HTR2A	64	9	19734	68.5208	1	0.284358	0.273174
GOTERM_BP_DIRECT	GO:0051122~hepoxilin biosynthetic process	2	3.125	0.0283736	ALOX15, ALOX12	64	9	19734	68.5208	1	0.284358	0.273174
GOTERM_BP_DIRECT	GO:1903351~cellular response to dopamine	2	3.125	0.0283736	LRRK2, ABL1	64	9	19734	68.5208	1	0.284358	0.273174
GOTERM_BP_DIRECT	GO:2000669~negative regulation of dendritic cell apoptotic process	2	3.125	0.0283736	BCL2, BCL2L1	64	9	19734	68.5208	1	0.284358	0.273174
GOTERM_BP_DIRECT	GO:0014909~smooth muscle cell migration	2	3.125	0.0283736	PLAU, BCL2	64	9	19734	68.5208	1	0.284358	0.273174
GOTERM_BP_DIRECT	GO:0060080~inhibitory postsynaptic potential	2	3.125	0.0314769	ADORA2A, DRD4	64	10	19734	61.6688	1	0.296012	0.28437
GOTERM_BP_DIRECT	GO:0043586~tongue development	2	3.125	0.0314769	KIT, EGFR	64	10	19734	61.6688	1	0.296012	0.28437
GOTERM_BP_DIRECT	GO:0070633~transepithelial transport	2	3.125	0.0314769	ABCB1, ABCG2	64	10	19734	61.6688	1	0.296012	0.28437
GOTERM_BP_DIRECT	GO:0140115~export across plasma membrane	2	3.125	0.0314769	ABCB1, ABCG2	64	10	19734	61.6688	1	0.296012	0.28437
GOTERM_BP_DIRECT	GO:0051093~negative regulation of developmental process	2	3.125	0.0314769	KIT, BCL2L1	64	10	19734	61.6688	1	0.296012	0.28437
GOTERM_BP_DIRECT	GO:0007600~sensory perception	2	3.125	0.0345705	ADORA2A, OPRM1	64	11	19734	56.0625	1	0.306227	0.294183
GOTERM_BP_DIRECT	GO:0006703~estrogen biosynthetic process	2	3.125	0.0345705	HSD17B1, CYP19A1	64	11	19734	56.0625	1	0.306227	0.294183
GOTERM_BP_DIRECT	GO:0060158~phospholipase C-activating dopamine receptor signaling pathway	2	3.125	0.0345705	DRD2, DRD4	64	11	19734	56.0625	1	0.306227	0.294183
GOTERM_BP_DIRECT	GO:0019372~lipoxygenase pathway	2	3.125	0.0345705	ALOX15, ALOX12	64	11	19734	56.0625	1	0.306227	0.294183
GOTERM_BP_DIRECT	GO:0001963~synaptic transmission, dopaminergic	2	3.125	0.0345705	ADORA2A, DRD4	64	11	19734	56.0625	1	0.306227	0.294183
GOTERM_BP_DIRECT	GO:0002903~negative regulation of B cell apoptotic process	2	3.125	0.0345705	BCL2, IL2	64	11	19734	56.0625	1	0.306227	0.294183
GOTERM_BP_DIRECT	GO:0033033~negative regulation of myeloid cell apoptotic process	2	3.125	0.0345705	BCL2, MIF	64	11	19734	56.0625	1	0.306227	0.294183
GOTERM_BP_DIRECT	GO:0042420~dopamine catabolic process	2	3.125	0.0376543	MAOB, MAOA	64	12	19734	51.3906	1	0.323965	0.311223
GOTERM_BP_DIRECT	GO:0046902~regulation of mitochondrial membrane permeability	2	3.125	0.0376543	BCL2, BCL2L1	64	12	19734	51.3906	1	0.323965	0.311223
GOTERM_BP_DIRECT	GO:0010389~regulation of G2/M transition of mitotic cell cycle	2	3.125	0.0407284	CDK4, CDK2	64	13	19734	47.4375	1	0.334851	0.321681
GOTERM_BP_DIRECT	GO:0031401~positive regulation of protein modification process	2	3.125	0.0407284	CSF1R, KIT	64	13	19734	47.4375	1	0.334851	0.321681
GOTERM_BP_DIRECT	GO:0035810~positive regulation of urine volume	2	3.125	0.0407284	ADORA2A, DRD2	64	13	19734	47.4375	1	0.334851	0.321681
GOTERM_BP_DIRECT	GO:0033628~regulation of cell adhesion mediated by integrin	2	3.125	0.0407284	PLAU, EPHA2	64	13	19734	47.4375	1	0.334851	0.321681
GOTERM_BP_DIRECT	GO:0060333~type II interferon-mediated signaling pathway	2	3.125	0.0407284	TYK2, RAF1	64	13	19734	47.4375	1	0.334851	0.321681
GOTERM_BP_DIRECT	GO:0051918~negative regulation of fibrinolysis	2	3.125	0.0407284	PLAU, F2	64	13	19734	47.4375	1	0.334851	0.321681
GOTERM_BP_DIRECT	GO:0010739~positive regulation of protein kinase A signaling	2	3.125	0.0437929	ADRB2, MIF	64	14	19734	44.0491	1	0.347558	0.333889
GOTERM_BP_DIRECT	GO:0060134~prepulse inhibition	2	3.125	0.0437929	ADORA2A, DRD2	64	14	19734	44.0491	1	0.347558	0.333889
GOTERM_BP_DIRECT	GO:1900272~negative regulation of long-term synaptic potentiation	2	3.125	0.0437929	ADORA1, ABL1	64	14	19734	44.0491	1	0.347558	0.333889
GOTERM_BP_DIRECT	GO:0019395~fatty acid oxidation	2	3.125	0.0468477	ALOX15, ALOX12	64	15	19734	41.1125	1	0.361359	0.347147
GOTERM_BP_DIRECT	GO:0048546~digestive tract morphogenesis	2	3.125	0.0468477	BCL2, EGFR	64	15	19734	41.1125	1	0.361359	0.347147
GOTERM_BP_DIRECT	GO:0010039~response to iron ion	2	3.125	0.0468477	BCL2, DRD2	64	15	19734	41.1125	1	0.361359	0.347147
GOTERM_BP_DIRECT	GO:1901386~negative regulation of voltage-gated calcium channel activity	2	3.125	0.0468477	DRD2, DRD4	64	15	19734	41.1125	1	0.361359	0.347147
GOTERM_BP_DIRECT	GO:1900034~regulation of cellular response to heat	2	3.125	0.0468477	EP300, SIRT1	64	15	19734	41.1125	1	0.361359	0.347147
GOTERM_BP_DIRECT	GO:0098664~G protein-coupled serotonin receptor signaling pathway	2	3.125	0.0498929	HTR2C, HTR2A	64	16	19734	38.543	1	0.380572	0.365604
GOTERM_BP_DIRECT	GO:2000145~regulation of cell motility	2	3.125	0.0498929	ABL1, RAF1	64	16	19734	38.543	1	0.380572	0.365604
GOTERM_BP_DIRECT	GO:2000573~positive regulation of DNA biosynthetic process	2	3.125	0.0529285	NOX4, HTR2A	64	17	19734	36.2757	1	0.392815	0.377366
GOTERM_BP_DIRECT	GO:0042770~signal transduction in response to DNA damage	2	3.125	0.0529285	CHEK1, ABL1	64	17	19734	36.2757	1	0.392815	0.377366
GOTERM_BP_DIRECT	GO:0042325~regulation of phosphorylation	2	3.125	0.0529285	IKBKB, RAF1	64	17	19734	36.2757	1	0.392815	0.377366
GOTERM_BP_DIRECT	GO:0021756~striatum development	2	3.125	0.0529285	LRRK2, DRD2	64	17	19734	36.2757	1	0.392815	0.377366
GOTERM_BP_DIRECT	GO:0055089~fatty acid homeostasis	2	3.125	0.0529285	ADORA1, SIRT1	64	17	19734	36.2757	1	0.392815	0.377366
GOTERM_BP_DIRECT	GO:0050872~white fat cell differentiation	2	3.125	0.0559546	PDGFRA, SIRT1	64	18	19734	34.2604	1	0.398061	0.382405
GOTERM_BP_DIRECT	GO:0060065~uterus development	2	3.125	0.0559546	ESR1, CYP19A1	64	18	19734	34.2604	1	0.398061	0.382405
GOTERM_BP_DIRECT	GO:0042417~dopamine metabolic process	2	3.125	0.0559546	DRD2, DRD4	64	18	19734	34.2604	1	0.398061	0.382405
GOTERM_BP_DIRECT	GO:0048143~astrocyte activation	2	3.125	0.0559546	ADORA2A, EGFR	64	18	19734	34.2604	1	0.398061	0.382405
GOTERM_BP_DIRECT	GO:0002028~regulation of sodium ion transport	2	3.125	0.0559546	ADRB2, DRD2	64	18	19734	34.2604	1	0.398061	0.382405
GOTERM_BP_DIRECT	GO:0035234~ectopic germ cell programmed cell death	2	3.125	0.0559546	KIT, BCL2L1	64	18	19734	34.2604	1	0.398061	0.382405
GOTERM_BP_DIRECT	GO:0008631~intrinsic apoptotic signaling pathway in response to oxidative stress	2	3.125	0.0559546	MELK, BCL2	64	18	19734	34.2604	1	0.398061	0.382405
GOTERM_BP_DIRECT	GO:0033280~response to vitamin D	2	3.125	0.0589712	ALPL, TYR	64	19	19734	32.4572	1	0.413099	0.396852
GOTERM_BP_DIRECT	GO:0009416~response to light stimulus	2	3.125	0.0589712	MAPK8, DRD2	64	19	19734	32.4572	1	0.413099	0.396852
GOTERM_BP_DIRECT	GO:2000811~negative regulation of anoikis	2	3.125	0.0589712	BCL2, BCL2L1	64	19	19734	32.4572	1	0.413099	0.396852
GOTERM_BP_DIRECT	GO:0042730~fibrinolysis	2	3.125	0.0619783	PLAU, F2	64	20	19734	30.8344	1	0.425481	0.408747
GOTERM_BP_DIRECT	GO:0050965~detection of temperature stimulus involved in sensory perception of pain	2	3.125	0.0619783	ADORA1, HTR2A	64	20	19734	30.8344	1	0.425481	0.408747
GOTERM_BP_DIRECT	GO:0001516~prostaglandin biosynthetic process	2	3.125	0.0619783	TBXAS1, MIF	64	20	19734	30.8344	1	0.425481	0.408747
GOTERM_BP_DIRECT	GO:0043651~linoleic acid metabolic process	2	3.125	0.0649759	ALOX15, ALOX12	64	21	19734	29.3661	1	0.43518	0.418065
GOTERM_BP_DIRECT	GO:0046677~response to antibiotic	2	3.125	0.0649759	HSP90AA1, ALPL	64	21	19734	29.3661	1	0.43518	0.418065
GOTERM_BP_DIRECT	GO:0021772~olfactory bulb development	2	3.125	0.0649759	CSF1R, LRRK2	64	21	19734	29.3661	1	0.43518	0.418065
GOTERM_BP_DIRECT	GO:0071391~cellular response to estrogen stimulus	2	3.125	0.0649759	ESR1, ESR2	64	21	19734	29.3661	1	0.43518	0.418065
GOTERM_BP_DIRECT	GO:0030520~estrogen receptor signaling pathway	2	3.125	0.0679641	ESR1, ESR2	64	22	19734	28.0312	1	0.448629	0.430984
GOTERM_BP_DIRECT	GO:0050709~negative regulation of protein secretion	2	3.125	0.0679641	DRD2, DRD4	64	22	19734	28.0312	1	0.448629	0.430984
GOTERM_BP_DIRECT	GO:0030318~melanocyte differentiation	2	3.125	0.0679641	KIT, BCL2	64	22	19734	28.0312	1	0.448629	0.430984
GOTERM_BP_DIRECT	GO:1900273~positive regulation of long-term synaptic potentiation	2	3.125	0.0709429	ADORA2A, DRD2	64	23	19734	26.8125	1	0.459456	0.441386
GOTERM_BP_DIRECT	GO:0051924~regulation of calcium ion transport	2	3.125	0.0709429	ADORA2A, BCL2	64	23	19734	26.8125	1	0.459456	0.441386
GOTERM_BP_DIRECT	GO:0002223~stimulatory C-type lectin receptor signaling pathway	2	3.125	0.0709429	IKBKB, EP300	64	23	19734	26.8125	1	0.459456	0.441386
GOTERM_BP_DIRECT	GO:0035855~megakaryocyte development	2	3.125	0.0709429	KIT, EP300	64	23	19734	26.8125	1	0.459456	0.441386
GOTERM_BP_DIRECT	GO:0051403~stress-activated MAPK cascade	2	3.125	0.0739124	IKBKB, MAPK8	64	24	19734	25.6953	1	0.469823	0.451345
GOTERM_BP_DIRECT	GO:0038095~Fc-epsilon receptor signaling pathway	2	3.125	0.0739124	IKBKB, MAPK8	64	24	19734	25.6953	1	0.469823	0.451345
GOTERM_BP_DIRECT	GO:0042327~positive regulation of phosphorylation	2	3.125	0.0768725	MIF, EGFR	64	25	19734	24.6675	1	0.475432	0.456733
GOTERM_BP_DIRECT	GO:0001836~release of cytochrome c from mitochondria	2	3.125	0.0768725	BCL2, BCL2L1	64	25	19734	24.6675	1	0.475432	0.456733
GOTERM_BP_DIRECT	GO:0060999~positive regulation of dendritic spine development	2	3.125	0.0768725	CDKL5, IL2	64	25	19734	24.6675	1	0.475432	0.456733
GOTERM_BP_DIRECT	GO:0042554~superoxide anion generation	2	3.125	0.0798233	NOX4, ALOX12	64	26	19734	23.7188	1	0.491468	0.472138
GOTERM_BP_DIRECT	GO:2001243~negative regulation of intrinsic apoptotic signaling pathway	2	3.125	0.0827648	BCL2, BCL2L1	64	27	19734	22.8403	1	0.493929	0.474503
GOTERM_BP_DIRECT	GO:0007205~protein kinase C-activating G protein-coupled receptor signaling pathway	2	3.125	0.0827648	ADORA2A, IL2	64	27	19734	22.8403	1	0.493929	0.474503
GOTERM_BP_DIRECT	GO:0007190~activation of adenylate cyclase activity	2	3.125	0.0827648	ADRB2, RAF1	64	27	19734	22.8403	1	0.493929	0.474503
GOTERM_BP_DIRECT	GO:0010875~positive regulation of cholesterol efflux	2	3.125	0.0827648	PON1, SIRT1	64	27	19734	22.8403	1	0.493929	0.474503
GOTERM_BP_DIRECT	GO:0032740~positive regulation of interleukin-17 production	2	3.125	0.0827648	TYK2, IL2	64	27	19734	22.8403	1	0.493929	0.474503
GOTERM_BP_DIRECT	GO:0050482~arachidonic acid secretion	2	3.125	0.0827648	DRD2, DRD4	64	27	19734	22.8403	1	0.493929	0.474503
GOTERM_BP_DIRECT	GO:0010971~positive regulation of G2/M transition of mitotic cell cycle	2	3.125	0.085697	CDK4, CDC25B	64	28	19734	22.0246	1	0.507164	0.487217
GOTERM_BP_DIRECT	GO:0045453~bone resorption	2	3.125	0.08862	NOX4, ADRB2	64	29	19734	21.2651	1	0.51998	0.499529
GOTERM_BP_DIRECT	GO:0006694~steroid biosynthetic process	2	3.125	0.08862	HSD17B1, CYP19A1	64	29	19734	21.2651	1	0.51998	0.499529
GOTERM_BP_DIRECT	GO:0009409~response to cold	2	3.125	0.0915339	HSP90AA1, ADRB2	64	30	19734	20.5562	1	0.532525	0.511581
GOTERM_BP_DIRECT	GO:1902042~negative regulation of extrinsic apoptotic signaling pathway via death domain receptors	2	3.125	0.0915339	RAF1, BCL2L1	64	30	19734	20.5562	1	0.532525	0.511581
GOTERM_BP_DIRECT	GO:0045930~negative regulation of mitotic cell cycle	2	3.125	0.0944385	ABL1, EGFR	64	31	19734	19.8931	1	0.544807	0.52338
GOTERM_BP_DIRECT	GO:0051281~positive regulation of release of sequestered calcium ion into cytosol	2	3.125	0.0944385	ABL1, F2	64	31	19734	19.8931	1	0.544807	0.52338
GOTERM_BP_DIRECT	GO:0008210~estrogen metabolic process	2	3.125	0.097334	PDGFRA, HSD17B1	64	32	19734	19.2715	1	0.55223	0.530511
GOTERM_BP_DIRECT	GO:0060325~face morphogenesis	2	3.125	0.097334	PDGFRA, EP300	64	32	19734	19.2715	1	0.55223	0.530511
GOTERM_BP_DIRECT	GO:0008306~associative learning	2	3.125	0.097334	ABL1, DRD2	64	32	19734	19.2715	1	0.55223	0.530511
